# Supplementary material for: Combined Modification of Fiber Materials by Enzymes and Metal Nanoparticles for Chemical and Biological Protection
Source: MDPI journal article supplement (doi:10.3390/ijms23031359), 2022-01-25
Supplement: s1 [file s1]

# Combined Modification of Fiber Materials by Enzymes and Metal Nanoparticles for Chemical and Biological Protection

Ilya Lyagin<sup>1,2</sup>, Nikolay Stepanov<sup>1,2</sup>, George Frolov<sup>3</sup> and Elena Efremenko<sup>1,2,\*</sup>

<sup>1</sup> Faculty of Chemistry, Lomonosov Moscow State University, Lenin Hills 1/3, Moscow 119991, Russia; lyagin@mail.ru (I.L.); na.stepanov@gmail.com (N.S.)

<sup>2</sup> N.M. Emanuel Institute of Biochemical Physics RAS, Kosygin str. 4, Moscow 119334, Russia

<sup>3</sup> Department of Physical Chemistry, National University of Science and Technology "MISIS", Leninsky ave. 4, Moscow 119049, Russia; georgifroloff@yandex.ru

\* Correspondence: elena\_efremenko@list.ru; Tel.: +7-(495)-939-3170; Fax: +7-(495)-939-5417

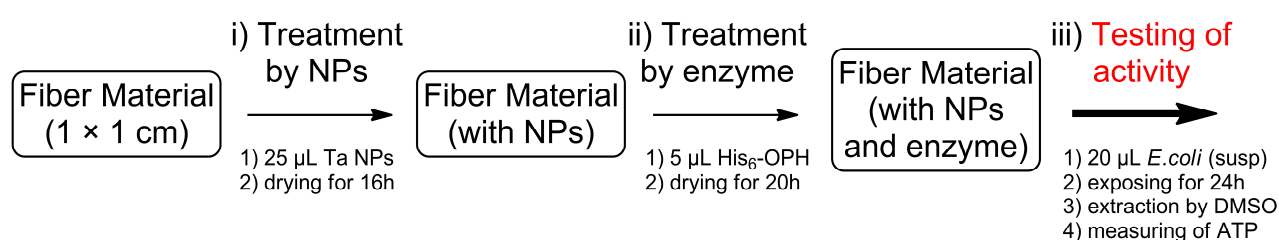

**Scheme S1.** General work-flow of fiber materials production. As an example, typical conditions for modification by combination of Ta nanoparticles with His<sub>6</sub>-OPH were supplied. Activity of ready-to-use fiber materials modified by nanoparticles and enzymes were further analyzed with bacterial cells (*B.subtilis* and *E.coli*) and organophosphorus pesticide (paraoxon).

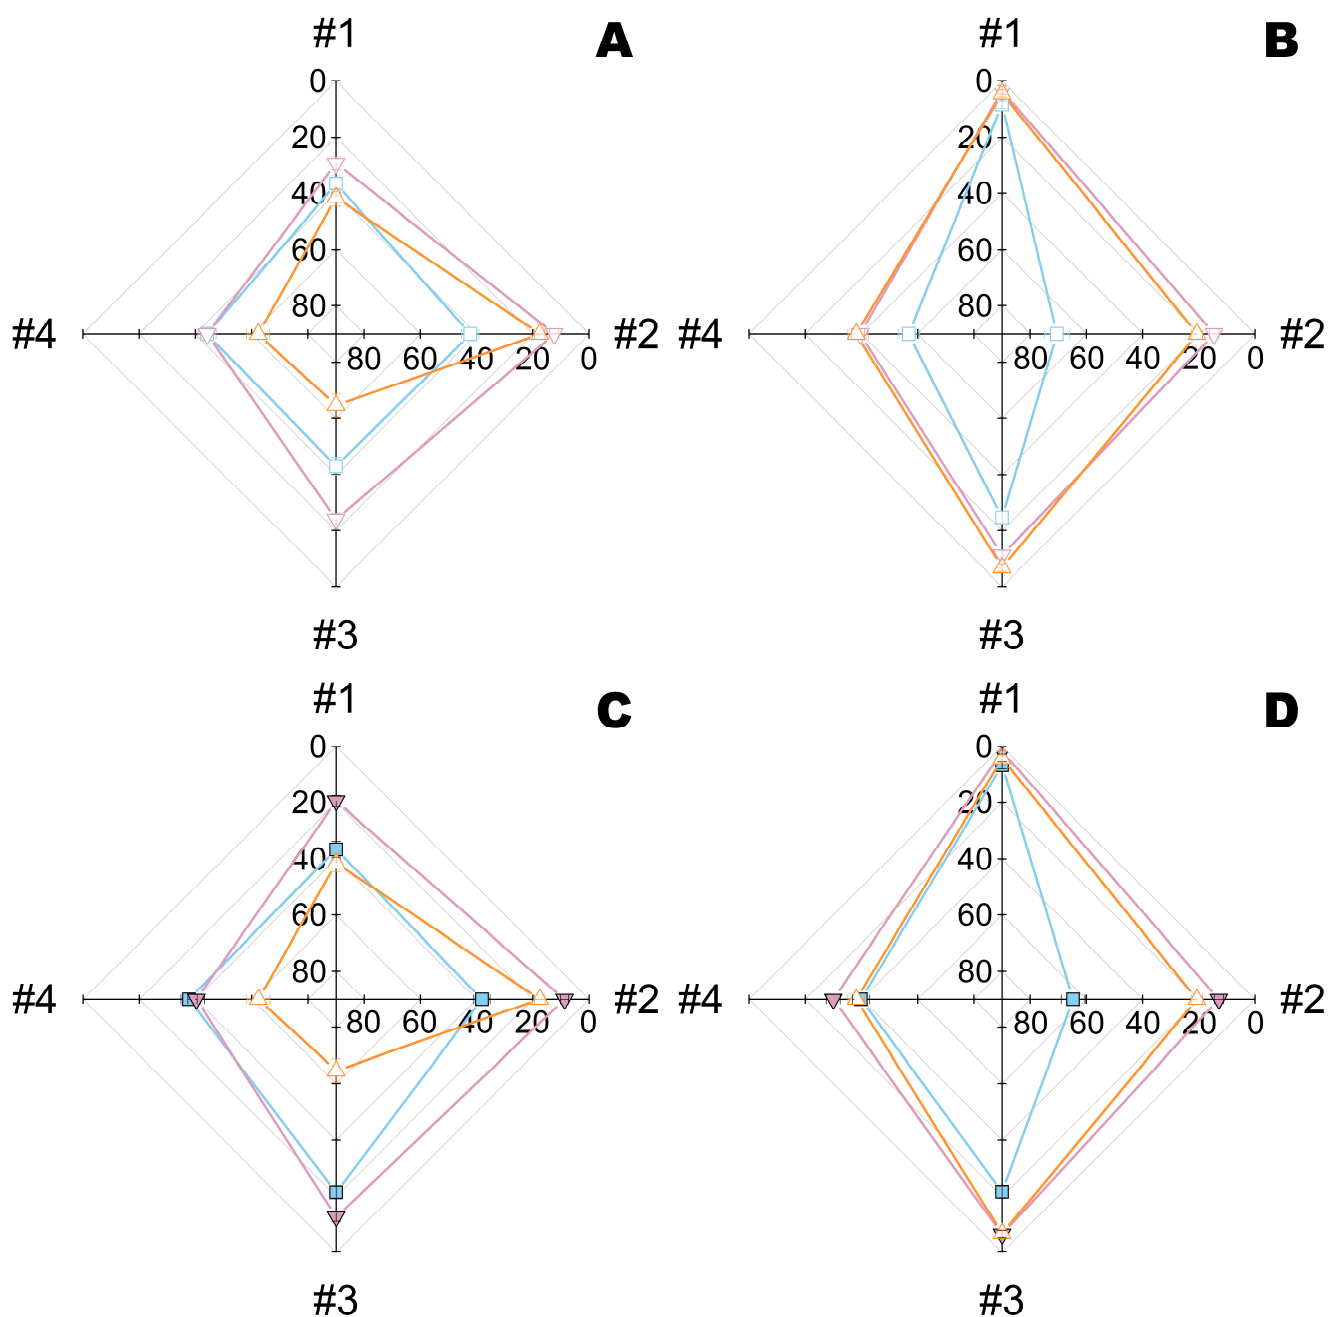

**Figure S1.** Residual intracellular ATP quantity (%) in *Bacillus subtilis* (A, C) and *Escherichia coli* bacterial cells (B, D) exposed for 24 h onto different fiber materials (#1, #2, #3, and #4) treated with Zn (A, B) or Ta nanoparticles (C, D), enzyme His<sub>6</sub>-OPH, or their combinations. ATP of bacterial cells similarly exposed on the same materials without treatment (i.e. controls) was taken as 100%. The His<sub>6</sub>-OPH was prepared as a complex with PEG-PL<sub>E50</sub> in a Na-carbonate buffer (pH 10.5). Designation: □ – Zn nanoparticles, △ – His<sub>6</sub>-OPH, ▽ – Zn nanoparticles with His<sub>6</sub>-OPH, ■ – Ta nanoparticles, ▼ – Ta nanoparticles with His<sub>6</sub>-OPH.
